# Supplementary material for: Association of endothelial dysfunction with sarcopenia and muscle function in a relatively young cohort of kidney transplant recipients
Source: PeerJ. 2021 Nov 22;9:e12521. doi: 10.7717/peerj.12521 (PMC8614188; doi:10.7717/peerj.12521)
Supplement: Supplemental Information 1 [file peerj-09-12521-s001.xls]

## Sheet: Raw data
Number	Age	Sex	KT_duration	Smoking	SBP	DBP	Vascular_reactive_index	VRI_group	BMI	Body_fat	Muscle_mass	SMI	Low_SMI	HGS	HGS_groups	Gait_speed	Gait_speed_group	Sarcopenia	Hb	TCH	TG	GluAC	IP	Cre	iPTH	DM	Hypertension	Hyperlipidemia	CV_disease	tacrolimus	mycophenolicacid	steroids	Rapamycin	cyclosporin
1	35	1	61	0	138	79	3.17	1	27.8	25	51.7	19.6997	0	38.7	0	0.909091	1	0	12	165	698	137	3	1.9	20	1	1	1	0	1	1	1	0	0
2	35	1	18	0	133	83	0.84	3	17.9	5	47.7	16.1236	1	27.6	1	1.1976	0	1	14	292	94	94	2.3	1.3	117.4	0	0	1	0	0	1	0	0	1
3	21	2	6	0	104	61	4.51	1	21.9	31.1	31.3	14.0043	1	22.9	0	1.07527	0	0	10	157	107	93	3.8	0.8	129	0	0	0	0	1	0	1	0	0
4	54	1	27	0	158	84	0.44	3	26.3	26.6	48.6	18.292	0	33.3	0	0.990099	1	0	11	184	123	100	2.9	1.3	100	0	0	0	0	1	0	1	0	0
5	47	2	97	0	118	73	1.84	2	23.9	35.3	35.5	14.5874	0	25.9	0	1.0929	0	0	9	251	206	108	3	2.3	124.3	1	0	1	0	0	0	1	1	0
6	46	2	92	0	152	83	1.11	2	34.8	28.7	54.5	23.2816	0	15.3	1	0.670391	1	0	10.4	322	819	223	3	2	70.7	1	1	1	0	0	0	1	0	0
7	50	2	86	0	124	77	2.29	1	18	25.1	29.5	12.7684	1	21.7	0	1.63043	0	0	13	180	47	80	3.5	0.7	96.6	0	0	0	0	1	1	1	0	0
8	63	1	6	1	151	79	0.92	3	24.9	26.6	57.5	17.359	0	28.7	0	0.807537	1	0	14.4	177	152	87	3.9	1.1	121.6	0	1	0	0	1	1	1	0	0
9	54	2	86	0	165	89	1.41	2	23.9	33.5	35.1	14.9942	0	23.9	0	1.01695	0	0	11	139	129	95	2.8	1.6	108	1	0	1	0	0	1	1	0	1
10	55	2	128	0	158	80	1.43	2	23.1	33.6	34.7	14.4433	0	24.3	0	1.07143	0	0	9.9	195	134	182	4.3	1.8	33.9	1	1	0	0	0	0	1	1	0
11	60	1	159	0	156	77	2.16	1	23.1	27.8	41	15.8173	1	24.7	1	1.1583	0	1	11	177	68	122	2.7	1.7	40	0	0	0	0	1	0	1	0	0
12	58	1	138	0	138	90	2.24	1	21.3	19.6	44.1	16.1983	1	34.7	0	1.29032	0	0	13	188	61	107	3.4	0.9	53	0	0	0	0	1	1	0	0	0
13	41	2	68	0	156	79	1.08	2	22.7	34.1	34.4	14.1354	1	22.6	0	1.14286	0	0	12	154	90	79	2.9	0.9	123	1	0	1	0	0	1	1	1	0
15	38	2	40	0	132	81	2.64	1	24.9	37	33.4	14.8444	0	25.5	0	1.34831	0	0	10.9	195	164	106	3	1.8	96.9	0	1	0	0	1	1	0	0	0
16	24	2	18	0	147	96	2.36	1	20.7	33	33.2	13.1324	1	17.4	1	0.875912	1	1	11	241	143	66	3	1.2	83.6	0	1	0	1	1	0	1	0	0
17	63	1	6	0	111	69	1.67	2	23.3	22.8	45.6	17.1629	0	43	0	0.636943	1	0	9.3	155	88	159	5.7	1.9	47.6	0	0	0	1	1	0	1	0	0
18	55	2	131	0	106	60	2.13	1	27.9	43.6	35.7	14.8595	0	16.8	1	0.815217	1	0	12	125	130	103	3.4	1.3	75.7	1	0	1	1	0	0	1	0	1
19	45	2	42	0	131	80	2.14	1	33.5	44.8	41.8	17.3985	0	20.1	0	1.07914	0	0	10	220	336	97	3.2	1.5	60.4	0	0	1	0	0	1	1	1	0
20	55	1	10	0	140	81	2.12	1	24.8	23.3	43.8	17.998	0	26.3	1	1.09091	0	0	14	141	287	80	2.2	1.1	102.9	1	0	1	0	1	1	1	0	0
21	34	1	37	0	128	84	2.05	1	25.4	25.3	53.8	17.9759	0	22.3	1	1	0	0	15	118	71	94	3	1.1	78	0	1	0	0	1	1	1	0	0
22	21	2	27	0	150	56	1.62	2	30.8	45.8	41.6	15.6573	0	21.5	0	1.13208	0	0	11.8	192	54	83	3.7	1	49	0	1	0	0	1	1	1	0	0
23	56	1	18	0	140	84	0.72	3	27.3	23	59.6	19.9138	0	32.6	0	1.02564	0	0	12	153	204	130	2.9	1.9	251.7	0	0	0	0	0	1	1	0	1
24	56	2	14	0	128	77	2.39	1	23.1	33.7	34.5	14.4531	0	16.9	1	0.940439	1	0	12	212	84	81	3.5	0.9	129	0	0	0	0	1	0	1	0	0
25	30	2	53	0	138	88	3.3	1	18.2	25	33	12.8906	1	27.3	0	1.2605	0	0	11	235	86	84	2.9	1.4	111	1	0	1	0	0	1	1	0	0
27	45	2	126	0	137	90	2.27	1	21.8	33.8	35.8	13.6412	1	25.9	0	1.14068	0	0	14	233	331	93	3.9	0.8	62.4	0	0	1	0	1	0	1	0	0
28	25	1	66	0	140	83	3.34	1	27.2	26.8	50	18.5901	0	14.6	1	1.17647	0	0	12.7	158	87	99	2.7	1.4	84.9	1	0	0	0	0	1	1	0	1
29	50	2	95	0	139	81	2.29	1	18.8	17.6	37	14.6355	0	18.8	0	0.808625	1	0	8.3	107	114	96	4.4	3.5	1092	1	0	0	1	1	0	1	0	0
30	43	2	45	0	146	95	2.69	1	27.7	39.9	39.1	15.6626	0	33.8	0	1.1811	0	0	16	258	91	80	3.6	1	234	0	0	0	1	0	1	1	0	1
31	47	2	25	0	148	92	2.79	1	20.1	29.8	33.1	13.3434	1	22	0	1.2959	0	0	13.6	196	140	106	2.9	0.6	118.9	0	1	0	0	1	1	1	0	0
33	51	1	129	0	136	89	2.33	1	21.4	18	47	16.6525	0	40.1	0	1.38568	0	0	14	181	98	89	2.9	1.3	49.4	0	0	0	0	1	1	1	0	0
34	51	2	87	0	166	93	2.09	1	17.3	23	25	12.7551	1	15.5	1	0.963082	1	1	13	210	51	107	2.7	0.7	190.6	0	1	1	0	0	0	0	1	0
35	47	1	139	0	138	89	2.01	1	20.4	17.1	42.9	16.048	1	30.9	0	1.48148	0	0	12	184	119	87	2.6	1.2	221.4	0	0	0	0	0	1	1	0	0
36	53	2	49	0	124	72	2.12	1	30.4	38.1	38.8	17.7137	0	17	1	0.882353	1	0	12.5	112	141	224	2.7	0.6	44	1	0	1	1	1	1	1	0	0
37	23	1	54	1	149	79	1.42	2	35.5	35.4	69	21.7776	0	56.7	0	0.925926	1	0	13	239	180	88	2.2	2.1	57.8	0	1	1	0	1	0	1	0	0
38	56	1	142	0	128	75	2.12	1	31.1	43.2	41.4	16.5839	0	24.7	1	0.921659	1	0	11	157	75	95	2.5	1.7	40.3	0	0	0	0	1	0	1	0	0
39	48	1	7	0	143	88	1.54	2	28	29.7	51.4	18.6529	0	30	0	1.02041	0	0	15	232	86	134	3.6	0.8	108	1	1	1	0	1	1	0	0	0
40	42	2	9	0	137	82	2.78	1	19.7	27.3	33.9	13.5796	1	24.4	0	1.16959	0	0	10	176	94	93	3.6	1.1	25.9	0	0	1	0	1	1	1	0	0
41	40	2	119	0	144	97	2.89	1	29.9	44.4	37.8	15.7336	0	25.7	0	1.07914	0	0	12	159	66	92	3.4	0.9	75.7	0	0	0	0	0	1	0	0	1
42	42	1	72	0	149	98	1.63	2	25.4	25.7	52.9	17.8813	0	47.6	0	1.07527	0	0	12	179	112	88	3.3	1.3	161	0	0	0	0	1	1	1	0	0
43	50	2	48	0	123	69	2.03	1	34.5	46.5	44.3	17.3047	0	16.7	1	1.00334	0	0	10	188	402	118	5.4	2.2	259	1	1	0	1	0	0	1	0	1
44	40	1	130	0	140	89	2.51	1	23	20.9	45.9	17.2758	0	40.9	0	1.07527	0	0	14	180	65	96	2.1	1.3	89.3	0	0	0	0	1	1	0	0	0
45	36	2	88	0	149	76	0.01	3	33.4	49.3	40.8	15.9375	0	10.3	1	0.794702	1	0	10	133	799	279	3.8	1.3	20.2	1	1	1	1	1	0	1	0	0
46	53	2	15	0	159	89	2.1	1	29.2	40.1	37.1	16.4889	0	23.2	0	1.34529	0	0	8.8	143	262	109	4.1	1.2	2.7	1	1	1	0	1	0	1	0	0
47	43	2	96	0	133	85	2.46	1	29.5	45.3	36.5	15.1925	0	12.1	1	1.37615	0	0	9.3	195	305	114	4.6	2	117.7	1	0	0	0	1	0	1	0	0
48	45	1	64	0	159	91	3.11	1	24.4	15.2	54.9	19.4515	0	38	0	1.20482	0	0	9	201	78	87	3.8	2.4	143.5	1	0	0	0	1	1	1	0	0
49	59	1	29	0	161	93	2.62	1	27	26	58.3	18.9284	0	37.1	0	1.08893	0	0	14.6	241	130	87	3.4	1.2	164.9	0	1	1	0	0	0	1	0	1
50	37	2	15	1	146	96	2.79	1	42.9	54.5	45.1	18.2969	0	25.9	0	0.944882	1	0	15	133	340	97	4.7	1.3	39.6	0	1	1	0	0	0	1	0	1
52	22	2	96	0	172	112	4.02	1	19.7	29.1	33.5	13.1681	1	21.3	0	1.36986	0	0	11	162	45	95	4.5	2	180	1	0	0	0	1	1	0	0	0
54	60	2	8	0	134	75	1.9	2	29.5	44.1	36.4	15.5496	0	18.2	0	0.928793	1	0	13	184	109	113	3.7	0.9	535	1	1	0	0	1	1	1	0	0
55	48	1	72	0	164	90	2.15	1	24.1	21.7	47.5	17.878	0	39.2	0	1.01868	0	0	14	165	114	110	2.2	1.4	57.9	1	0	1	0	1	1	1	0	0
56	49	2	59	0	151	96	2.13	1	24	38.9	38	13.7901	1	28.8	0	1.11317	0	0	11	187	193	215	2.8	1.1	149.2	1	1	0	0	1	1	1	0	0
57	43	2	143	0	142	79	1.79	2	23.3	36.4	35.3	13.9631	1	23.1	0	1.13208	0	0	10	257	128	88	3.6	2	110.6	1	0	1	0	1	1	1	0	0
58	51	1	86	0	159	66	2.07	1	29.2	25.9	64.2	20.4922	0	42.8	0	1.34529	0	0	12	216	115	87	3	1.8	106.1	1	1	0	0	0	0	1	0	1
59	59	2	26	0	153	92	2.8	1	27	37.9	36.9	15.7632	0	22.4	0	0.983607	1	0	12	158	97	93	2.4	1.5	168.4	0	1	1	1	1	0	0	0	0
60	34	2	20	0	142	89	0.12	3	19.1	23.4	37.6	13.8108	1	33.5	0	1.44578	0	0	13	206	105	96	2.8	0.9	179	0	0	0	0	1	1	0	0	0
61	48	1	91	0	159	66	2.07	1	22.2	23.7	44.7	16.0278	1	43.9	0	1.22951	0	0	12	156	214	94	3.6	1.4	86.8	1	0	0	0	1	1	1	0	0
62	46	1	85	0	123	77	1.88	2	21.4	28.3	37	14.4531	1	34.9	0	1.16505	0	0	15	187	110	93	3.5	1.5	38.7	1	0	0	0	1	1	1	0	0
63	48	2	93	0	176	93	1.58	2	24.5	35.8	37.8	14.7656	0	26	0	1.28755	0	0	9.3	180	167	98	4.1	2.4	158	1	0	1	0	1	0	1	0	0
64	46	1	163	0	127	71	1.7	2	22.1	22.5	43.1	16.2219	1	22.6	1	0.863309	1	1	12	158	44	91	3.9	2.3	175.4	1	0	0	1	1	1	1	0	0
65	43	1	102	1	164	105	3.18	1	19.3	19.1	48.5	14.8042	1	42.9	0	1.51515	0	0	15	204	183	94	2.7	1.3	67.5	1	0	1	0	0	1	1	0	1
66	45	1	121	0	121	81	1.88	2	27.2	29.4	51.4	18.2115	0	45.3	0	1.47783	0	0	15	199	83	102	3.1	0.8	86.3	0	0	0	0	1	1	0	0	0
67	55	2	62	0	140	78	2.52	1	20.1	28	33	13.7357	1	19.2	0	1.26316	0	0	13	168	89	100	3.4	0.9	93	0	0	0	0	1	1	1	0	0
68	29	1	87	0	148	99	1.94	2	25.4	22.4	58.6	18.7047	0	60.4	0	0.978793	1	0	12.2	192	83	86	3.7	2.23	76.3	1	0	0	0	1	1	1	0	0
69	47	1	143	0	158	82	1.74	2	22.4	21.2	44	16.7657	0	29.2	0	0.917431	1	0	11	175	103	136	3.6	1.4	85.8	0	0	0	0	0	0	1	0	1
70	37	1	8	0	112	72	2	1	20.7	13.2	48.1	17.0422	0	39.6	0	1.2474	0	0	17	196	132	127	1.8	1.3	179.2	0	1	0	0	1	1	1	0	0
71	45	1	70	0	181	103	1.35	2	22.7	19.7	45.8	17.2381	0	31.9	0	0.870827	1	0	11	187	381	100	4.5	3.1	664	0	1	0	0	0	0	1	1	0
72	52	1	62	0	148	99	0.27	3	26	29.2	44.6	17.4219	0	27.5	1	0.911854	1	0	15	210	158	96	2.15	1.4	199	0	0	1	0	1	0	1	0	0
73	49	2	44	0	130	79	0.45	3	18.6	25.1	31.2	13.1557	1	24.5	0	0.884956	1	1	11	183	63	77	3.9	0.8	52.9	0	1	1	1	1	1	0	0	0
74	41	2	169	0	160	88	1.15	2	22.7	31.3	36	14.6985	0	20.5	0	0.930233	1	0	6.8	292	452	198	5.1	6.6	175.5	1	1	1	0	1	1	1	0	0
75	54	1	15	0	150	91	1.86	2	22.9	16.9	45	18.026	0	40.8	0	1.3245	0	0	16	206	83	941	3	1	181.3	0	1	1	0	1	1	1	0	0
76	56	1	8	0	159	90	0.83	3	20.2	28.4	40.1	13.7136	1	23.7	1	0.974026	1	1	16	224	195	94	3.9	1.4	33.9	1	1	1	0	1	0	1	0	0
77	52	1	89	0	165	83	1.14	2	21.2	14.2	45.3	17.2611	0	31.8	0	0.857143	1	0	10	313	289	103	3.8	2.3	79.9	1	1	1	1	1	0	1	1	0
78	34	2	75	0	142	95	1.44	2	21.7	27.7	41.5	14.7038	0	27	0	1.16505	0	0	12	185	126	90	2.8	1.2	172.2	0	1	0	0	1	1	0	0	0
79	29	2	138	0	149	88	0.54	3	20.6	27.9	31	14.0575	1	24.3	0	0.902256	1	1	11	169	192	79	3	2	323	1	0	1	0	0	0	1	1	0
80	50	2	72	0	131	74	1.95	2	25.5	39.2	34.2	14.6098	0	25.5	0	1.17647	0	0	11.2	167	197	88	2.6	1	160.8	0	0	0	0	1	0	1	0	0
81	30	2	27	0	132	86	1.75	2	25	36.5	39.2	14.9367	0	28.7	0	1.10497	0	0	14	169	66	82	3	0.9	63.8	0	0	0	0	1	1	0	0	0
82	52	1	61	0	125	72	1.89	2	26.2	37.8	42.2	15.3143	1	45	0	0.878477	1	1	15	153	148	126	2.3	0.8	307	0	0	0	0	1	1	1	0	0
83	54	1	12	1	121	57	1.65	2	22.4	21.9	42.4	16.5625	0	36.6	0	1.07527	0	0	10	133	104	106	2.9	1.5	25	0	1	1	1	0	1	1	0	0
84	53	1	111	1	105	62	1.65	2	25.2	26	44.7	17.6813	0	33.3	0	1.00671	0	0	14	170	97	190	3.2	0.7	47.5	1	1	0	0	1	1	0	0	0
85	26	2	231	0	144	91	1.84	2	21.5	31.3	30.7	14.0157	1	25	0	1.21704	0	0	11	225	142	83	3.3	1.6	155	1	0	0	0	0	1	1	0	0
86	60	1	132	0	171	81	1.57	2	21.2	22.6	49.4	15.5915	1	32.9	0	1.02564	0	0	11.3	180	93	123	2.2	1.6	46	1	1	0	1	1	0	1	0	0
87	47	1	132	0	157	100	2.1	1	24.1	25.4	48.7	17.2548	0	32.9	0	0.996678	0	0	12	162	155	114	3.5	1	34.3	1	1	0	1	1	1	1	0	0
88	45	1	63	1	174	101	0.2	3	21.7	19.8	48.2	16.4837	1	34.5	0	1.16279	0	0	16.2	143	69	90	3.3	2.9	81	1	0	0	0	0	1	1	0	0
89	60	2	192	0	149	70	0.07	3	20.9	27.4	33.2	14.3698	0	13.2	1	0.705053	1	0	7.1	183	115	89	4.6	1.6	67.3	0	1	1	0	0	1	1	0	1
90	48	1	6	0	117	68	0.26	3	21.1	17.6	42.2	16.4844	1	22.3	1	0.978793	1	1	15	166	166	162	3.6	0.8	38.7	1	0	0	0	1	1	1	0	0
91	38	1	68	0	159	91	1.82	2	27.2	34.4	46.9	16.9178	0	32	0	1.06007	0	0	15	205	153	89	2.2	0.9	60.4	0	0	1	0	0	1	1	0	1
92	55	2	105	0	128	74	1.65	2	26.3	41.1	34.2	14.6098	0	22.1	0	0.745342	1	0	15	154	176	113	1.4	1.4	96.3	1	0	0	0	1	1	1	0	0
93	38	1	47	0	133	88	2.1	1	22.6	16.5	54.2	17.902	0	35.6	0	1.33333	0	0	14	211	134	89	2.7	1	57.1	0	0	0	0	0	1	0	1	0
94	64	1	97	0	177	78	2.01	1	26.6	9.1	66.2	22.9066	0	31.7	0	0.679502	1	0	11	234	84	102	2.9	1	103.7	0	0	1	0	1	1	1	0	0
95	22	2	106	0	141	94	1.84	2	21.9	33.4	31.1	13.8222	1	26.2	0	1.39211	0	0	11	174	162	92	3.7	1.4	46	0	0	1	0	1	0	0	0	0
96	35	2	122	0	113	67	2.51	1	19.6	28.9	33.7	13.1641	1	22	0	0.967742	1	1	8.9	193	92	92	4.8	5.3	75.6	0	0	0	0	1	0	1	0	0
97	61	1	73	0	119	73	2.01	1	27.9	27.7	57.3	19.1453	0	27.2	1	0.733496	1	0	9.9	98	206	94	3.2	3.5	184	0	1	0	1	1	1	1	0	0
98	50	2	171	0	195	122	1.54	2	20.8	26.5	36.9	14.4141	0	20.2	0	1.25261	0	0	9.6	322	183	99	5	3.9	157	0	1	1	1	1	1	1	0	0
99	30	2	63	0	190	126	2.44	1	21.1	27.8	38.6	14.3516	0	21.5	0	1.56658	0	0	9.4	232	43	79	2.6	1	160.2	1	0	0	0	0	1	1	0	1
100	31	2	226	0	172	93	2.11	1	23.7	36.4	35.1	14.2399	0	23	0	0.923077	1	0	8.8	197	166	185	3.7	2.4	129.5	1	1	1	0	0	1	1	0	1
